# Supplementary material
Source: PubMed Central journal article supplement (PMC2878379)
Supplement: NIHMS120160-supplement-1_si_001.pdf [file NIHMS120160-supplement-1_si_001.pdf]

## Supporting Information

### Cadmium(II) Complex Formation with Cysteine and Penicillamine

*Farideh Jalilehvand\**, *Bonnie O. Leung and Vicky Mah*

Department of Chemistry, University of Calgary, Calgary, AB, Canada

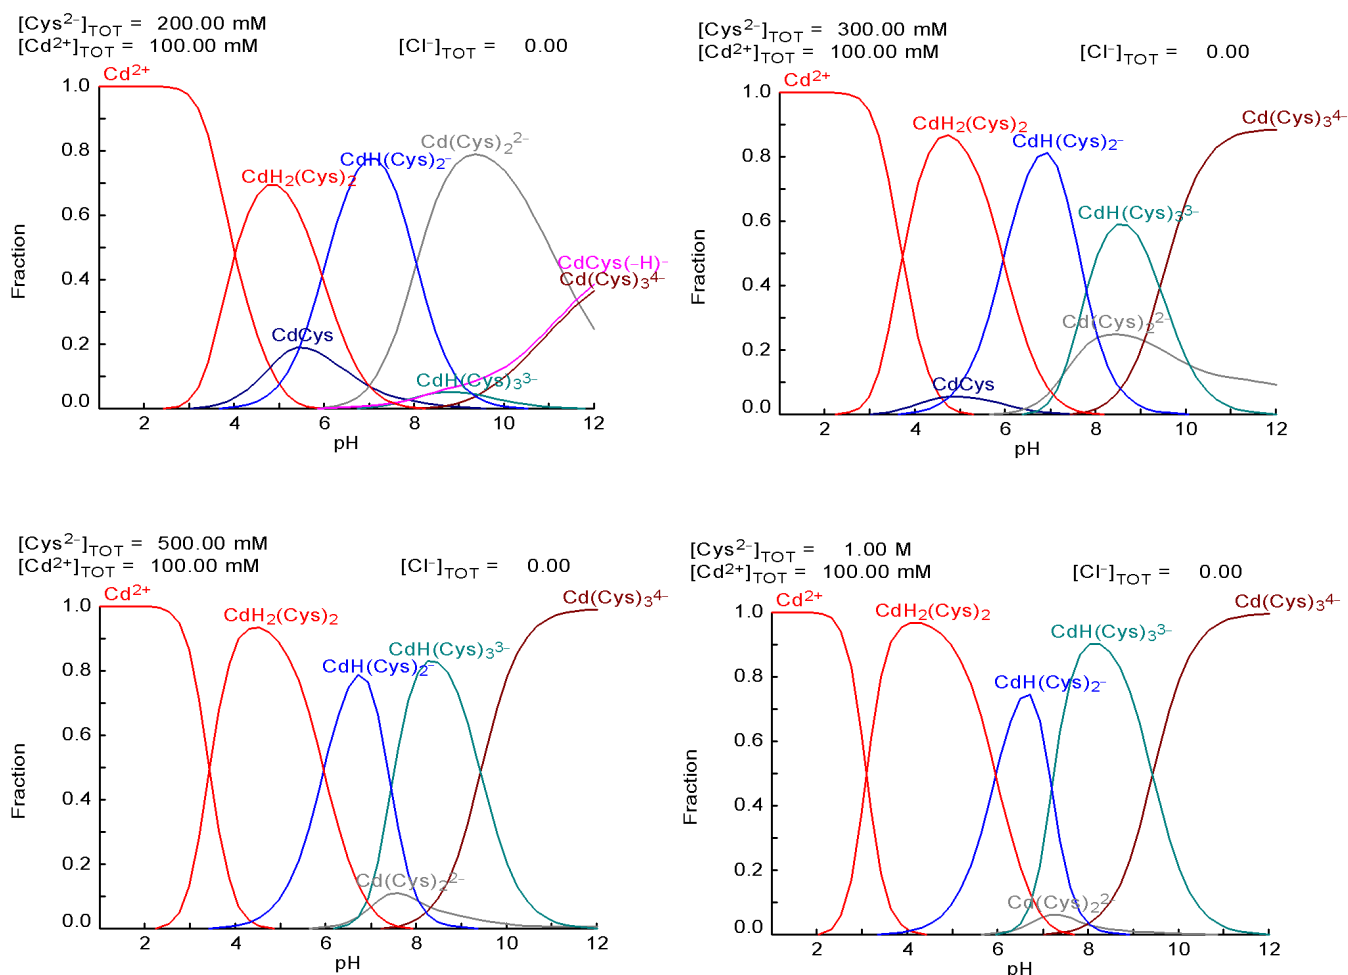

**Figure S-1.** Distribution diagrams for cadmium(II) cysteine complexes as a function of pH in solutions **A, B, D** and **E**, containing  $C_{\text{Cd}^{2+}} \sim 0.1 \text{ mol dm}^{-3}$  and  $(\text{H}_2\text{Cys} / \text{Cd}^{2+})$  ratios 2.0, 3.0, 5.0 and 10.0 (*Ref.* 14).

The following complexes were considered as the result of reaction between  $\text{Cd}^{2+}$ ,  $\text{Cys}^{2-}$  and  $\text{H}^+$ :

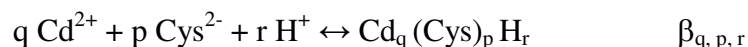

$\text{Cd}(\text{Cys})$  ( $\log \beta_{1,1,0} = 10.3$ ),  $\text{Cd}(\text{Cys})(\text{OH})$  ( $\log \beta_{1,1,-1} = 2.42$ ),  $\text{Cd}(\text{Cys})_2$  ( $\log \beta_{1,2,0} = 16.92$ ),  $\text{Cd}(\text{HCys})(\text{Cys})$  ( $\log \beta_{1,2,1} = 24.97$ ),  $\text{Cd}(\text{HCys})_2$  ( $\log \beta_{1,2,2} = 30.93$ ),  $\text{Cd}(\text{Cys})_3$  ( $\log \beta_{1,3,0} = 19.78$ ) and  $\text{Cd}(\text{HCys})(\text{Cys})_2$  ( $\log \beta_{1,3,1} = 29.21$ ). These formation constants were calculated for cadmium(II) and cysteine complexation at 37 °C in the ionic medium  $0.15 \text{ mol dm}^{-3} \text{ NaCl}$ , with total cysteine concentration ranging between  $0.005$  to  $0.020 \text{ mol dm}^{-3}$  (*Ref.* 14).

The distribution diagrams in Figure S-1 were calculated with MEDUSA computer program (<http://www.kemi.kth.se/medusa/>). The full input file to MEDUSA is:

4, 21, 6, 0 /MEDUSA, t= 25 C, p= 1

H+  
 Cd 2+  
 Cys 2-  
 Cl-  
 HCys - , 10.26 1 0 1 0  
 H2Cys , 18.48 2 0 1 0  
 H3Cys + , 20.52 3 0 1 0  
 CdCys , 10.3 0 1 1 0  
 Cd(Cys)2 2- , 16.92 0 1 2 0  
 Cd(Cys)3 4- , 19.78 0 1 3 0  
 CdH(Cys)3 3- , 29.21 1 1 3 0  
 CdCys(-H) - , 2.42 -1 1 1 0  
 CdH(Cys)2 - , 24.97 1 1 2 0  
 CdH2(Cys)2 , 30.93 2 1 2 0  
 Cd(OH)2 , -20.35 -2 1 0 0  
 Cd(OH)3- , -33.3 -3 1 0 0  
 Cd(OH)4 2- , -47.35 -4 1 0 0  
 Cd2OH 3+ , -9.39 -1 2 0 0  
 Cd4(OH)4 4+ , -32.85 -4 4 0 0  
 CdCl+ , 1.98 0 1 0 1  
 CdCl2 , 2.6 0 1 0 2  
 CdCl3- , 2.4 0 1 0 3  
 CdClOH , -7.404 -1 1 0 1  
 CdOH+ , -10.08 -1 1 0 0  
 OH- , -14.0 -1 0 0 0  
 Cd(OH)2(am) , -13.73 -2 1 0 0  
 \*Cd(OH)2(cr) , -13.65 -2 1 0 0  
 CdCl2(c) , 0.68 0 1 0 2  
 CdCl2:2.5H2O(c) , 1.94 0 1 0 2  
 CdO(cr) , -13.77 -2 1 0 0  
 CdOHCl(c) , -3.52 -1 1 0 1

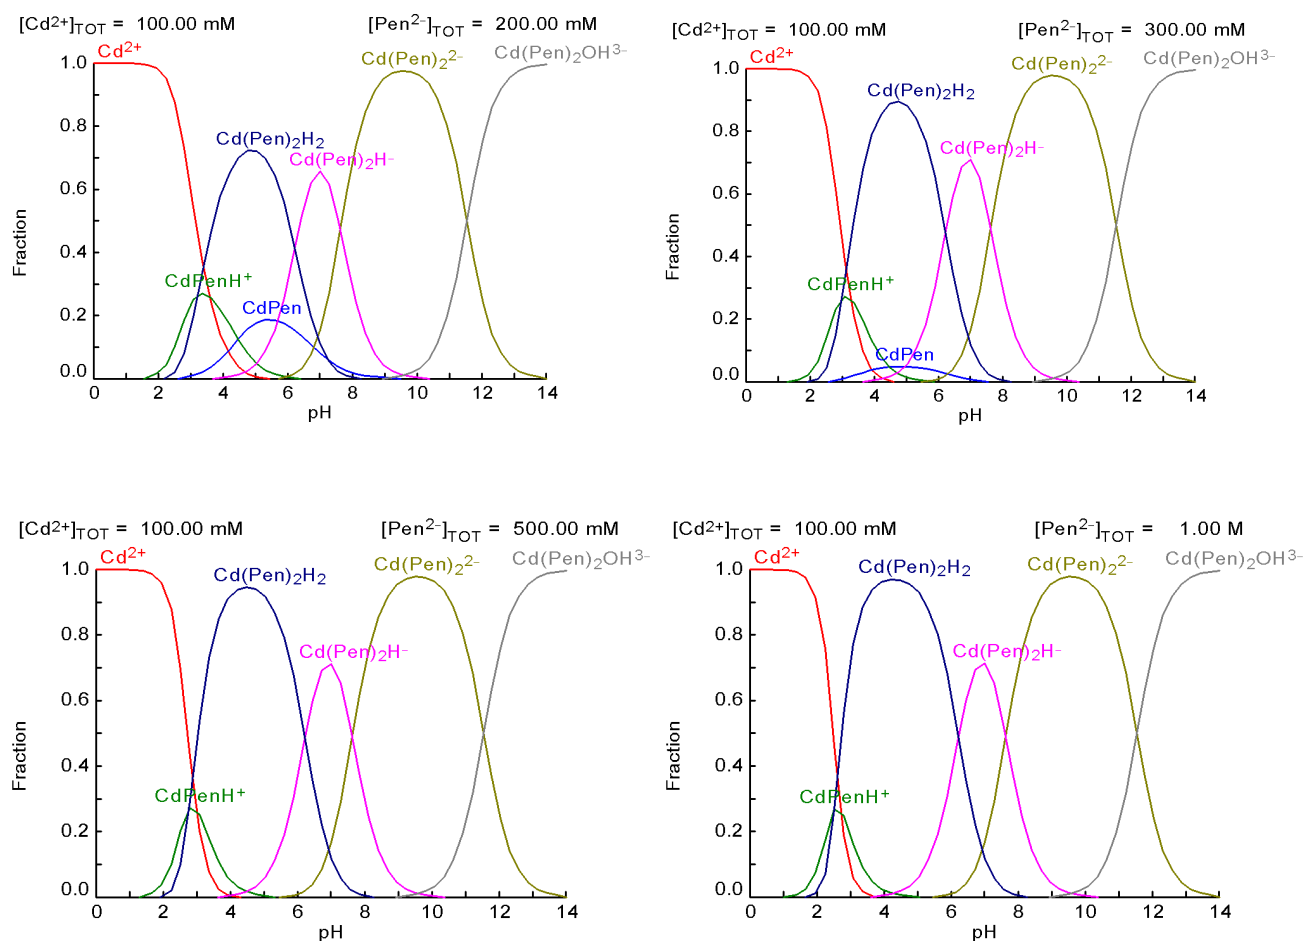

**Figure S-2a.** Distribution diagrams for cadmium(II) penicillamine complexes as a function of pH in solutions **H**, **I**, **K** and **L**, containing  $C_{\text{Cd}^{2+}} \sim 0.1 \text{ mol dm}^{-3}$  and  $(\text{H}_2\text{Pen} / \text{Cd}^{2+})$  ratios 2.0, 3.0, 5.0 and 10.0 (*Ref.* 15). The following complexes were considered as the result of reaction between  $\text{Cd}^{2+}$ ,  $\text{Pen}^{2-}$  and  $\text{H}^+$ :

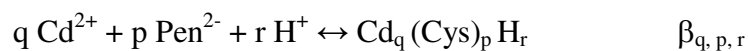

$[\text{Cd}(\text{Pen})]$  ( $\log \beta_{1,1,0} = 12.68$ ),  $[\text{Cd}(\text{HPen})]^+$  ( $\log \beta_{1,1,1} = 17.15$ ),  $[\text{Cd}(\text{HPen})(\text{Pen})]^-$  ( $\log \beta_{1,2,1} = 28.31$ ),  $[\text{Cd}(\text{Pen})_2]^{2-}$  ( $\log \beta_{1,2,0} = 20.68$ ),  $[\text{Cd}(\text{HPen})_2]$  ( $\log \beta_{1,2,2} = 34.53$ ) and  $[\text{Cd}(\text{Pen})_2(\text{OH})]^{3-}$  ( $\log \beta_{1,2,-1} = 9.14$ ). These formation constants were obtained for cadmium(II) and penicillamine complexation at 25 °C in the ionic medium  $3.0 \text{ mol dm}^{-3} \text{ NaClO}_4$  (*Ref.* 15).

The distribution diagrams in Figure S-2a were calculated with MEDUSA computer program (<http://www.kemi.kth.se/medusa/>). The full input file to MEDUSA is:

```

3, 16, 3, 0 /HYDRA, t=25 C
H+
Cd 2+
Pen 2-
CdPen      , 12.68  0 1 1
CdPenH+    , 17.15  1 1 1
Cd(Pen)2 2- , 20.68  0 1 2
Cd(Pen)2H - , 28.31  1 1 2
Cd(Pen)2H2 , 34.53  2 1 2
Cd(Pen)2OH 3- , 9.14  -1 1 2
Cd(OH)2    , -20.35 -2 1 0
Cd(OH)3-   , -33.3  -3 1 0
Cd(OH)4 2- , -47.35 -4 1 0
Cd2OH 3+   , -9.39  -1 2 0
Cd4(OH)4 4+ , -32.85 -4 4 0
CdOH+      , -10.08 -1 1 0
HPen -     , 11.01  1 0 1
H2Pen      , 19.61  2 0 1
H3Pen +    , 22.04  3 0 1
OH-        , -14.0  -1 0 0
Cd(OH)2(am) , -13.73 -2 1 0
Cd(OH)2(c) , -13.65 -2 1 0
CdO(c)     , -13.77 -2 1 0

```

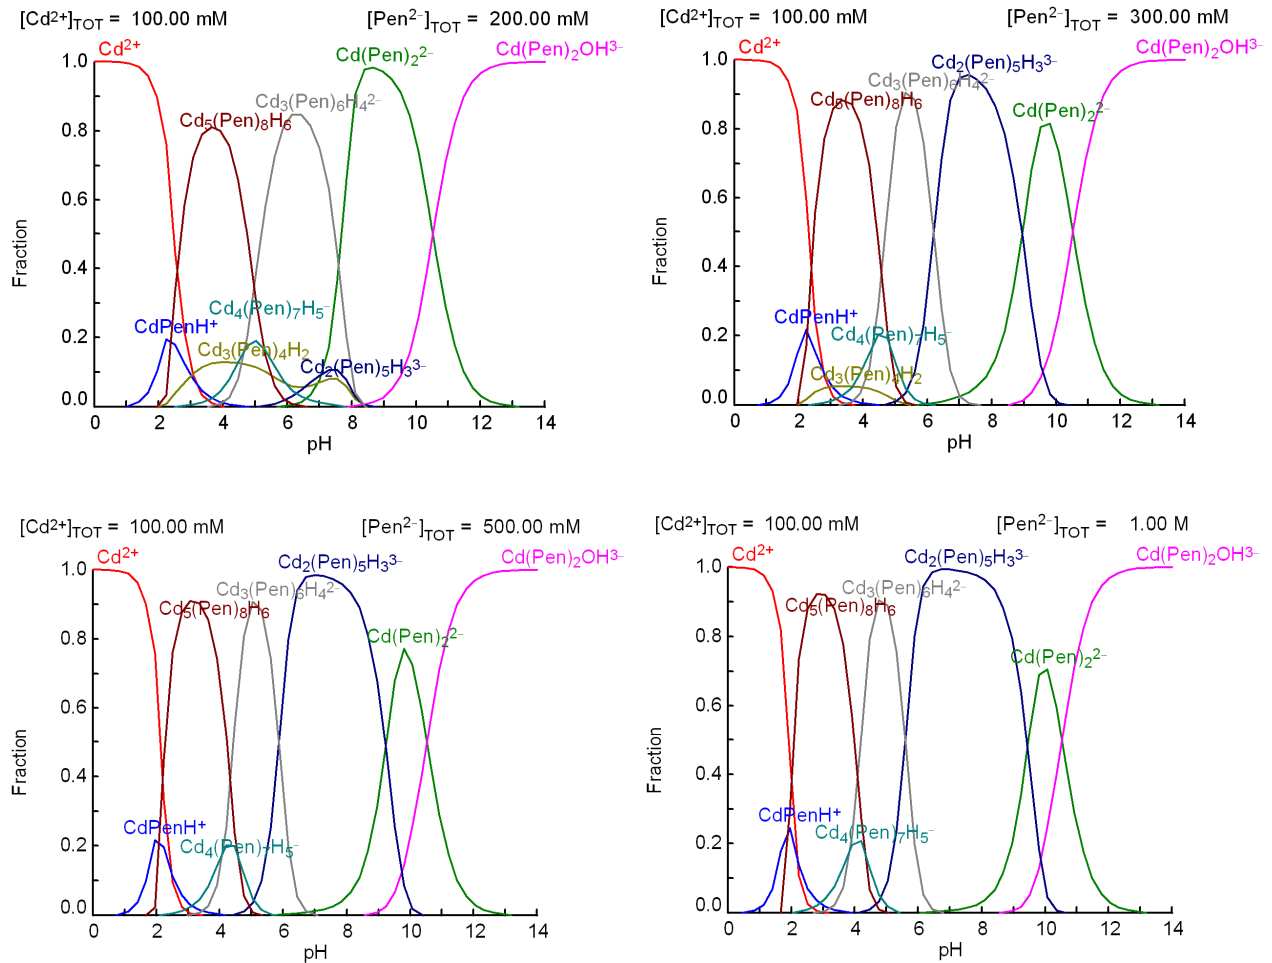

**Figure S-2b.** Distribution diagrams for cadmium(II) penicillamine complexes as a function of pH in solutions containing  $C_{Cd^{2+}} \sim 0.1 \text{ mol dm}^{-3}$  and  $(H_2Pen / Cd^{2+})$  ratios 2.0, 3.0, 5.0 and 10.0 (*Ref.* 16). The following complexes were considered as the result of reaction between  $Cd^{2+}$ ,  $Pen^{2-}$  and  $H^+$ :

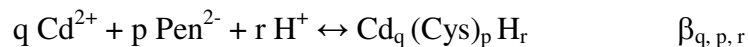

$[Cd(HPen)]^+$  ( $\log \beta_{1,1,1} = 16.39$ ),  $[Cd(Pen)_2]^{2-}$  ( $\log \beta_{1,2,0} = 20.27$ ),  $[Cd(Pen)_2(OH)]^{3-}$  ( $\log \beta_{1,2,-1} = 9.74$ ),  $[Cd_2(HPen)_3(Pen)_2]^{3-}$  ( $\log \beta_{2,5,3} = 71.04$ ),  $[Cd_3(HPen)_2(Pen)_2]$  ( $\log \beta_{3,4,2} = 63.26$ ),  $[Cd_3(HPen)_4(Pen)_2]^{2-}$  ( $\log \beta_{3,6,4} = 93.54$ ),  $[Cd_4(HPen)_5(Pen)_2]^{2-}$  ( $\log \beta_{4,7,5} = 113.4$ ),  $[Cd_5(HPen)_6(Pen)_2]$  ( $\log \beta_{5,8,6} = 133.8$ ). These formation constants were obtained for cadmium(II) and penicillamine complexation at 25 °C in the ionic medium  $0.2 \text{ mol dm}^{-3} KNO_3$ , with  $[Cd^{2+}]_{total} = 1 - 5 \text{ mmol dm}^{-3}$  and 3-fold or more excess of penicillamine (*Ref.* 16).

The distribution diagrams in Figure S-2b were calculated with MEDUSA computer program (<http://www.kemi.kth.se/medusa/>). The full input file to MEDUSA is:

```

3, 18, 3, 0 /HYDRA, t=25 C
H+
Cd 2+
Pen 2-
CdPenH+      , 16.39      1 1 1
Cd(Pen)2 2-  , 20.27      0 1 2
Cd3(Pen)4H2   , 63.26      2 3 4
Cd(Pen)2OH 3- , 9.74        -1 1 2
Cd2(Pen)5H3 3- , 71.04      3 2 5
Cd3(Pen)6H4 2- , 93.54      4 3 6
Cd5(Pen)8H6   , 133.8      6 5 8
Cd4(Pen)7H5-  , 113.4      5 4 7
Cd(OH)2       , -20.35     -2 1 0
Cd(OH)3-     , -33.3      -3 1 0
Cd(OH)4 2-   , -47.35     -4 1 0
Cd2OH 3+     , -9.39       -1 2 0
Cd4(OH)4 4+  , -32.85     -4 4 0
CdOH+        , -10.08     -1 1 0
HPen -       , 10.42       1 0 1
H2Pen        , 18.30       2 0 1
H3Pen +      , 20.20       3 0 1
OH-          , -14.0        -1 0 0
Cd(OH)2(am)  , -13.73     -2 1 0
Cd(OH)2(c)   , -13.65     -2 1 0
CdO(c)       , -13.77     -2 1 0

```

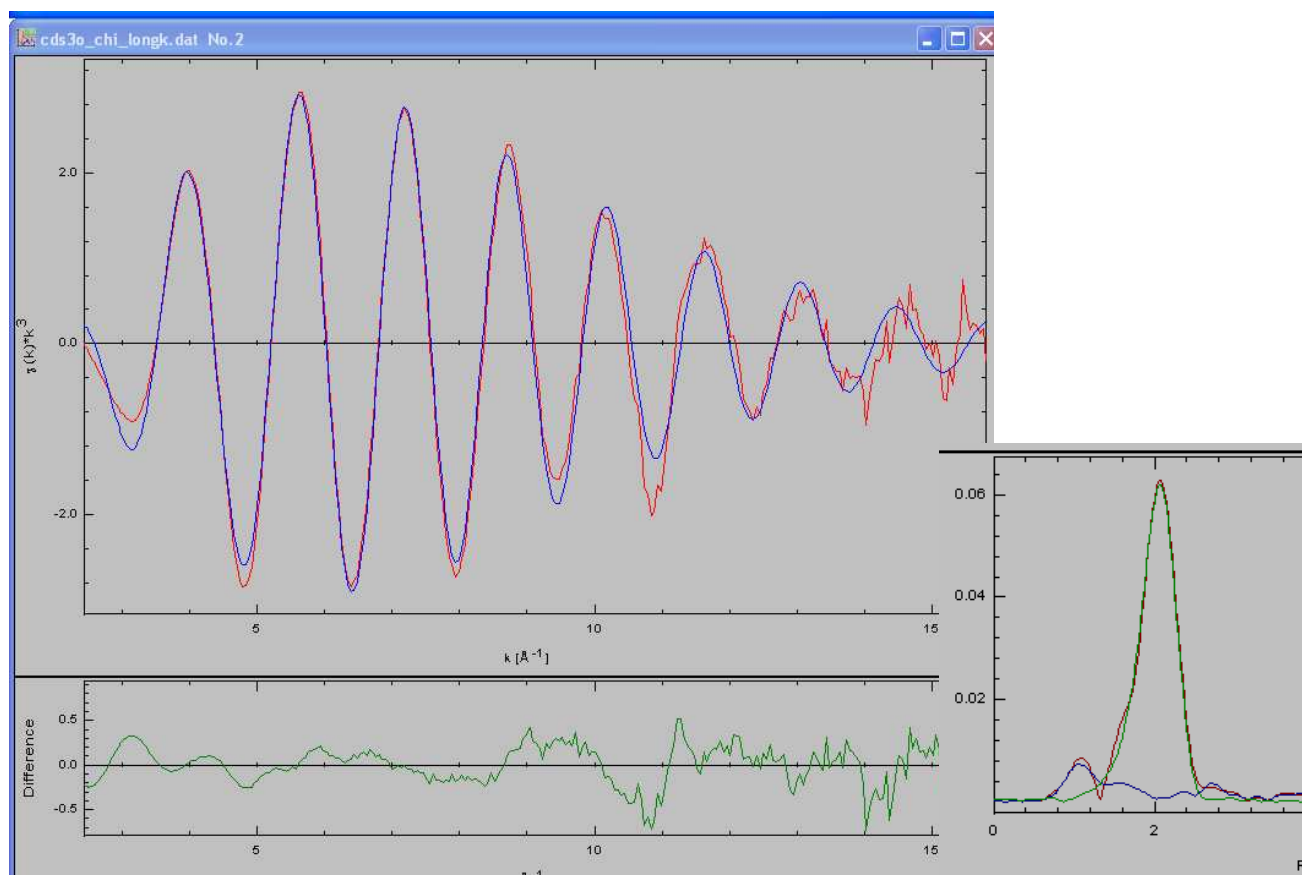

```

Iterations: 50
(CHI)^2: 14840731
Residual: 16.817822
No F-Test!
-----
feff-SO
-----
#1 SO^2: 0.8697974
-----
feff-Fit - feff0003.dat, Cd - S
-----
#2 Coord.No.: 3
#3 distance R: 2.513419
#4 sigma^2: 0.006228921
#5 E0 shift: -0.349685
-----
feff-Fit - feff0001.dat, Cd - O
-----
#6 Coord.No.: 1
#7 distance R: 2.310047
#8 sigma^2: 0.01580909
#9 E0 shift: -0.349685

```

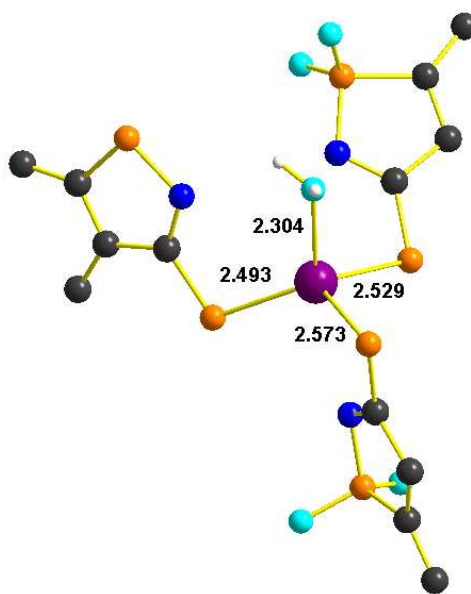

**Figure S-3a.** Least-squares curve-fitting of the  $k^3$ -weighted EXAFS spectrum of imidazolium tris(thiosaccharinato)aqua cadmate(II), (HIm)[Cd(tsac)<sub>3</sub>(H<sub>2</sub>O)], as CdS<sub>3</sub>O model. For simulating the theoretical EXAFS oscillation, the atomic coordinates of its crystal structure were used in the ATOMS program to generate the FEFF input file.



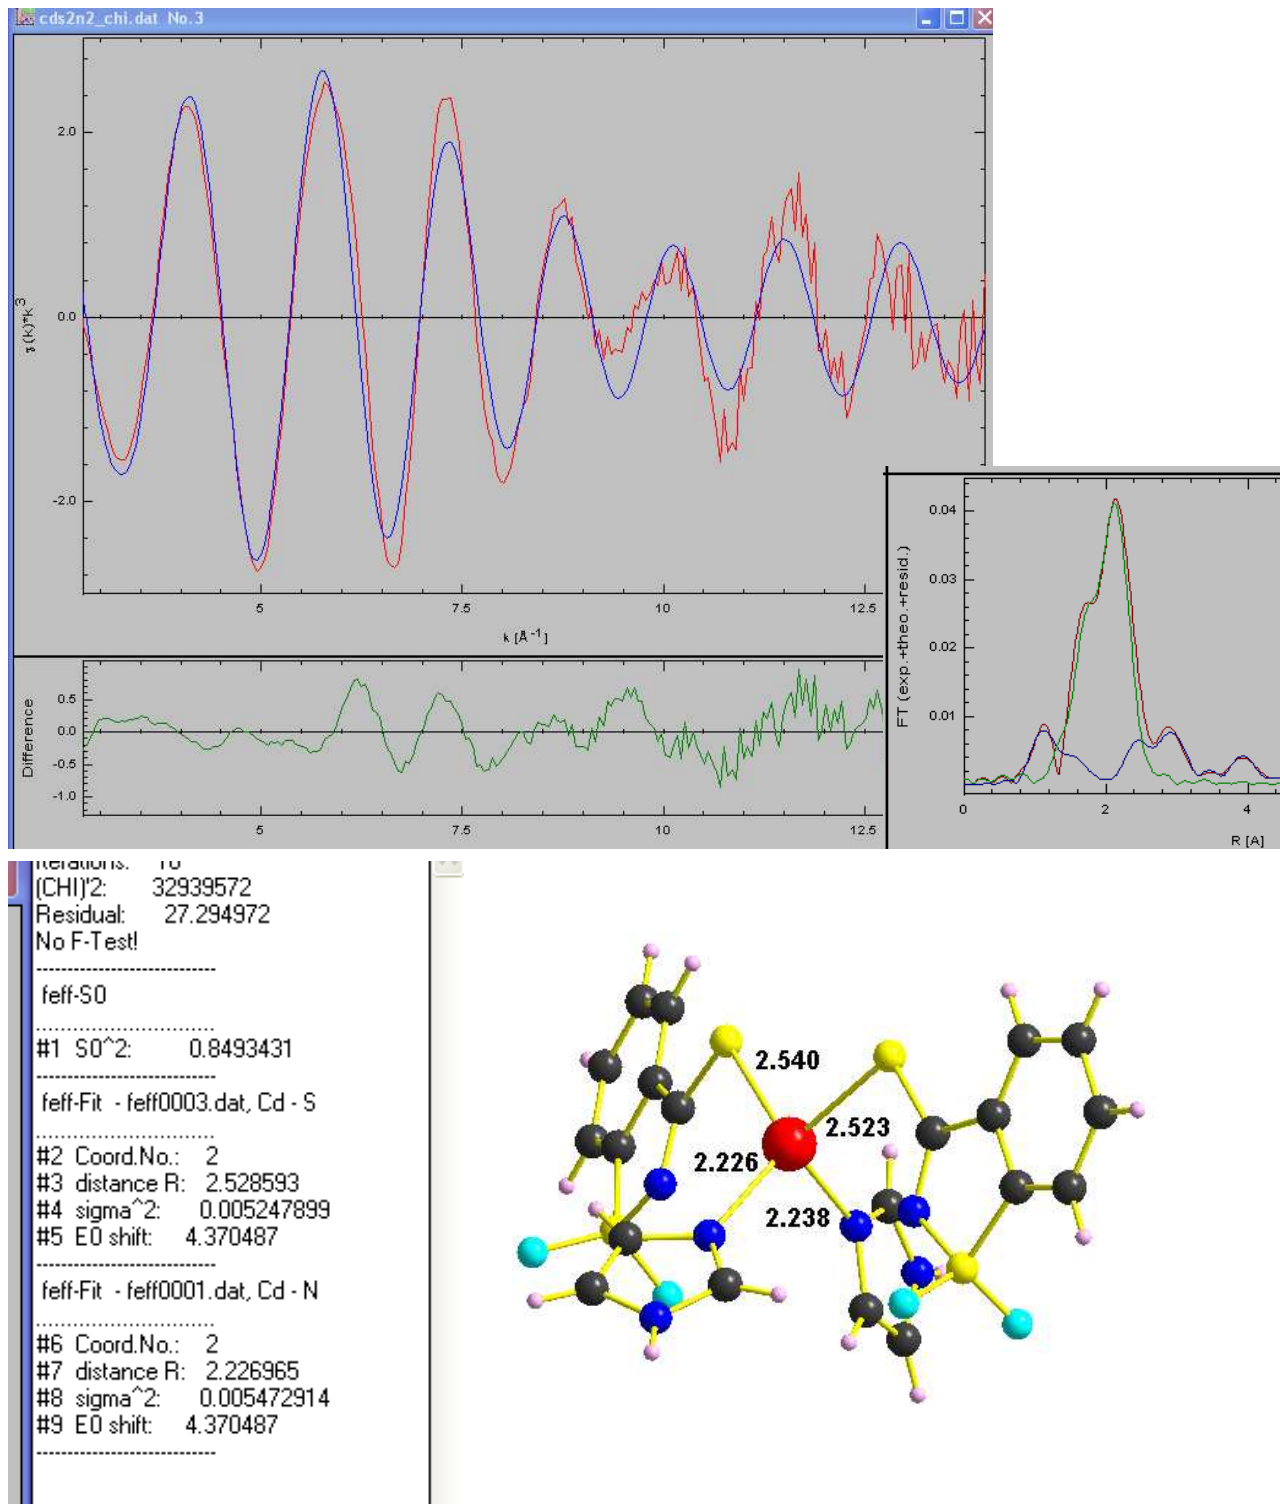

**Figure S-3b.** Least-squares curve-fitting of the  $k^3$ -weighted EXAFS spectrum of bis(thiosaccharinato)bis(imidazole) cadmium(II),  $[\text{Cd}(\text{tsac})_2(\text{Im})_2]$ , as  $\text{CdS}_2\text{N}_2$  model. For simulating the theoretical EXAFS oscillation, the atomic coordinates of its crystal structure were used in the ATOMS program to generate the FEFF input file.

**Table S-1.** Total number of scans collected during the  $^{113}\text{Cd}$  NMR measurements for Cd(II) – cysteine and penicillamine solutions, and the full width at half-height (FWHH) for the observed NMR signals

| Cysteine solution<br>(pH = 7.5) | No. scans | FWHH (Hz) | Solution<br>(pH = 11.0) | No. scans | FWHH (Hz) |
|---------------------------------|-----------|-----------|-------------------------|-----------|-----------|
| <b>A1</b>                       | 3489      | 2320      | <b>A2</b>               | 805       | 761       |
| <b>B1</b>                       | 736       | 945       | <b>B2</b>               | 1040      | 271       |
| <b>C1</b>                       | 750       | 418       | <b>C2</b>               | 658       | 190       |
| <b>D1</b>                       | 511       | 115       | <b>D2</b>               | 605       | 157       |
| <b>E1</b>                       | 376       | 33        | <b>E2</b>               | 537       | 136       |
| <b>F1</b>                       | 181       | 15        | <b>F2</b>               | 539       | 21        |
| <b>G1</b>                       | 154       | 16        | <b>G2</b>               | 550       | 17        |

  

| Penicillamine solution<br>(pH = 7.5) | No. scans | FWHH (Hz) | Solution<br>(pH = 11.0) | No. scans | FWHH (Hz) |
|--------------------------------------|-----------|-----------|-------------------------|-----------|-----------|
| <b>H1</b>                            | 4299      | 2120      | <b>H2</b>               | 11348     | 77        |
| <b>I1</b>                            | 1531      | 1595      | <b>I2</b>               | 1118      | 114       |
| <b>J1</b>                            | 750       | 805       | <b>J2</b>               | 278       | 106       |
| <b>K1</b>                            | 626       | 447       | <b>K2</b>               | 434       | 92        |
| <b>L1</b>                            | 500       | 55        | <b>L2</b>               | 724       | 19        |
| <b>M1</b>                            | 141       | 14        | <b>M2</b>               | 542       | 6         |
| <b>N1</b>                            | 353       | 38        | <b>N2</b>               | 550       | 6         |

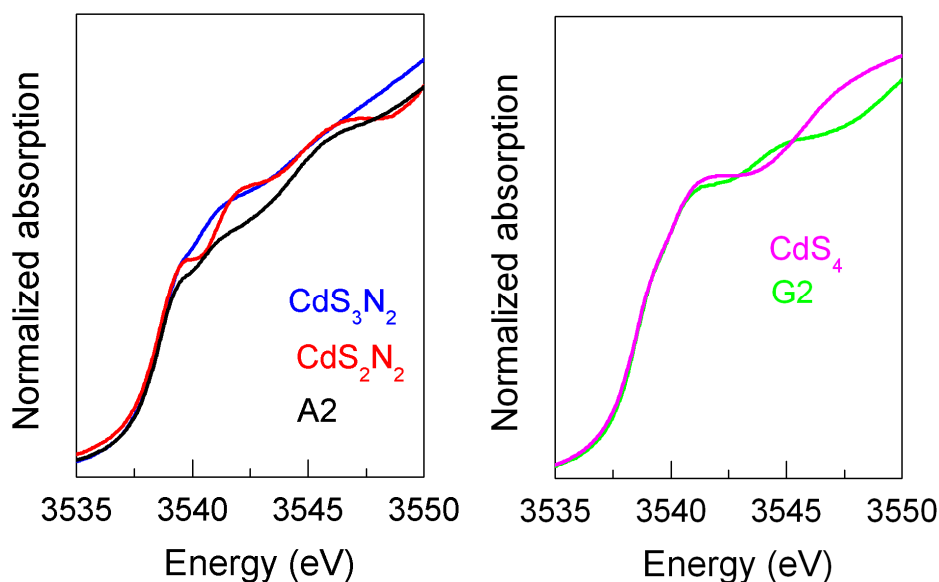

**Figure S-4.** Cd L<sub>3</sub>-edge XANES spectra of cadmium(II) cysteine solutions **A2** and **G2** (pH = 11), compared with those of crystalline Cd(II) complexes with CdS<sub>2</sub>N<sub>2</sub>, CdS<sub>3</sub>N<sub>2</sub> and CdS<sub>4</sub> geometries.

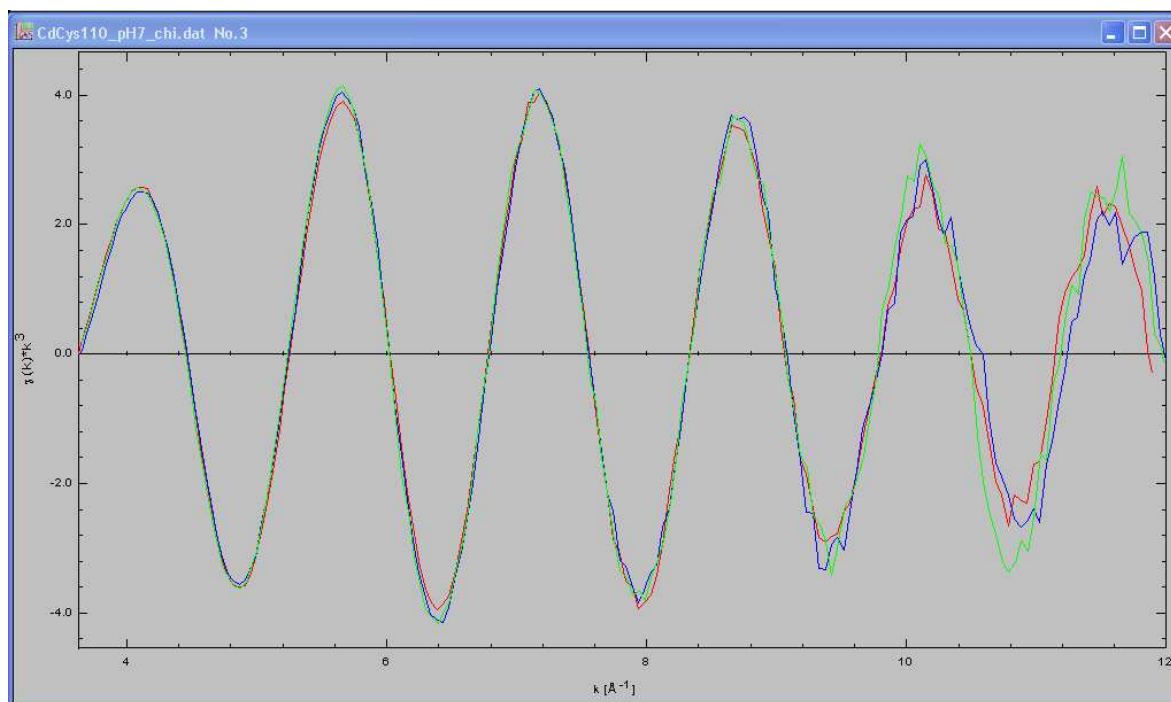

**Figure S-5.** Comparison between the  $k^3$ -weighted EXAFS spectra of cadmium(II) cysteine solutions **E1** (red), **F1** (blue) and **G1** (green) solutions (pH = 7.5).

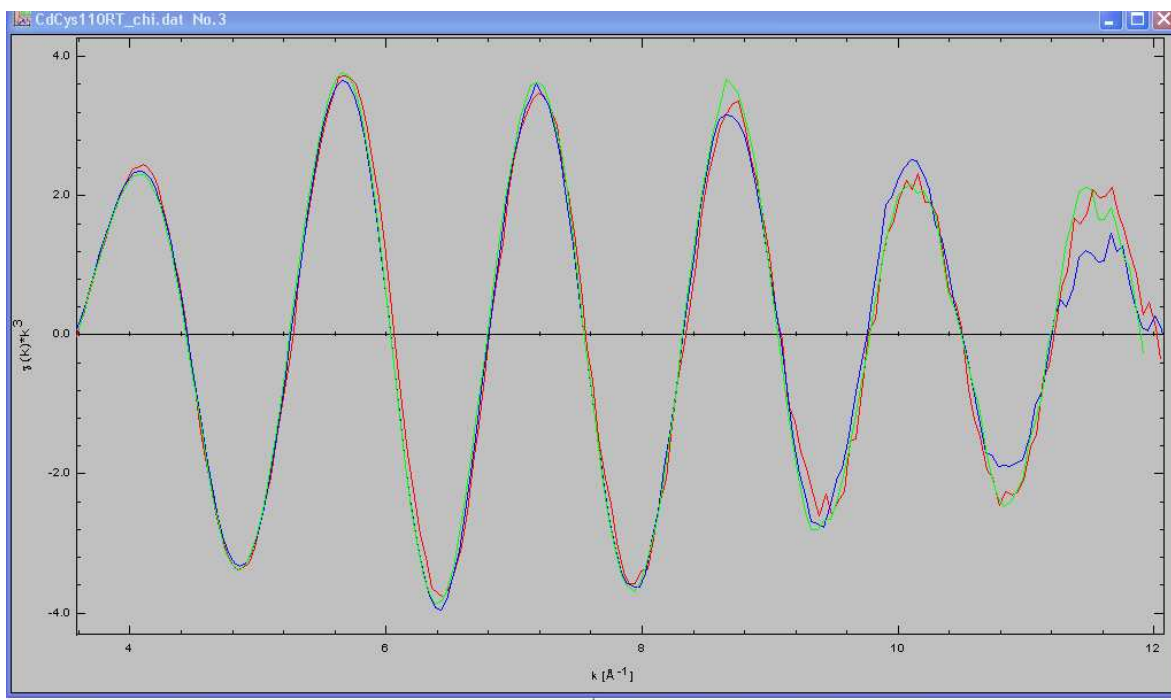

**Figure S-6.** Comparison between the  $k^3$ -weighted EXAFS spectra of cadmium(II) cysteine solutions **E2** (red), **F2** (blue) and **G2** (green) solutions (pH = 11.0).

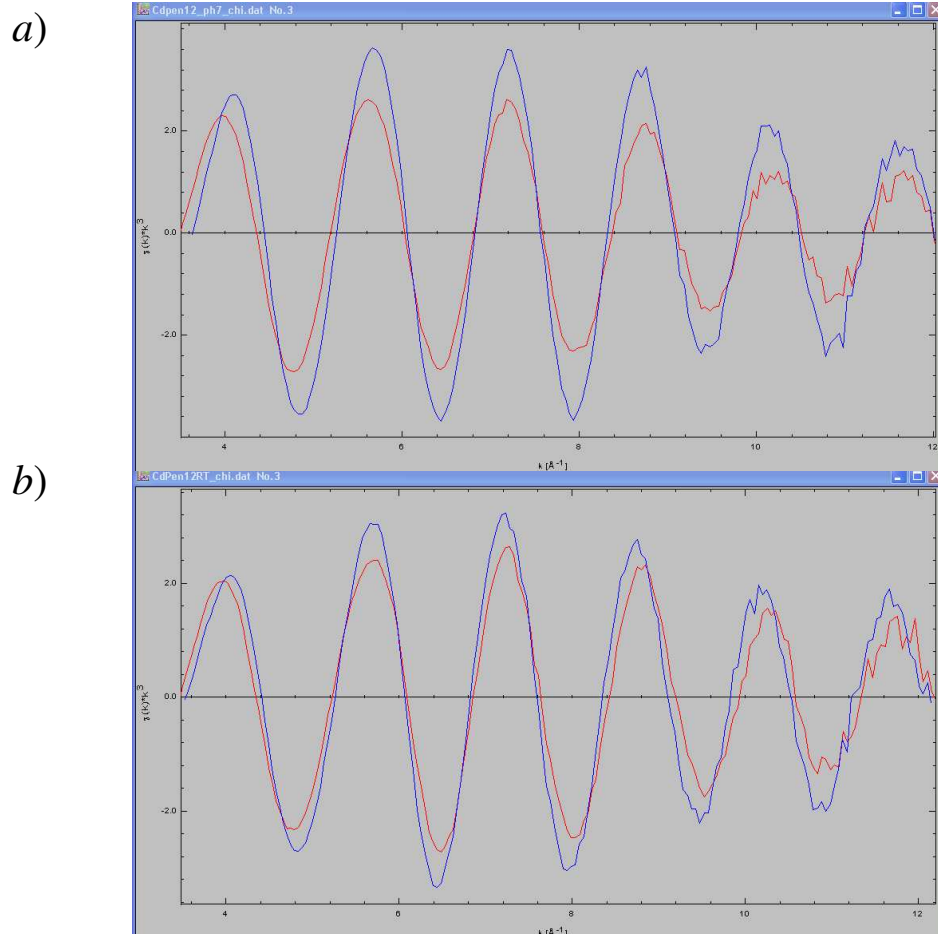

**Figure S-7.** Comparison between the  $k^3$ -weighted EXAFS spectra of cadmium(II) penicillamine solutions: a) H1 (red) and L1 (blue) (pH = 7.5); b) H2 (red) and L2 (blue) (pH = 11.0).

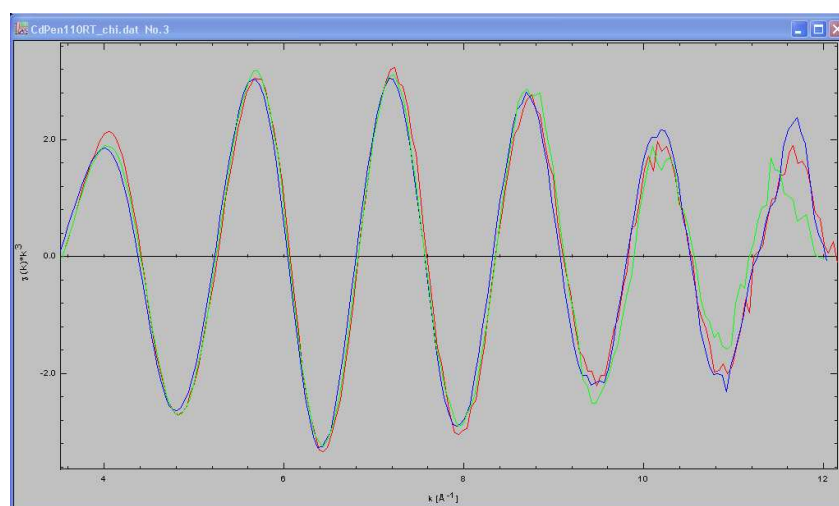

**Figure S-8.** Comparison between the  $k^3$ -weighted EXAFS spectra of cadmium(II) penicillamine solutions L2 (red), M2 (blue) and N2 (green) solutions (pH = 11.0).

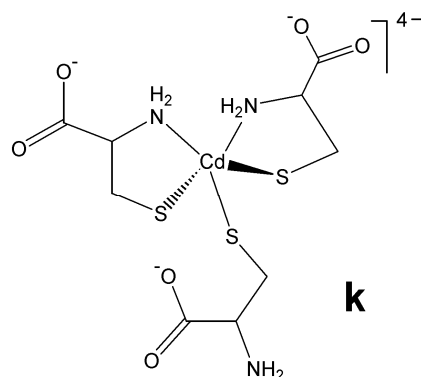

**Scheme S-1.** Structure **k** with CdS<sub>3</sub>N<sub>2</sub> geometry does not seem to be a feasible structure for [Cd(Cys)<sub>3</sub>]<sup>4-</sup> complex (see the text).

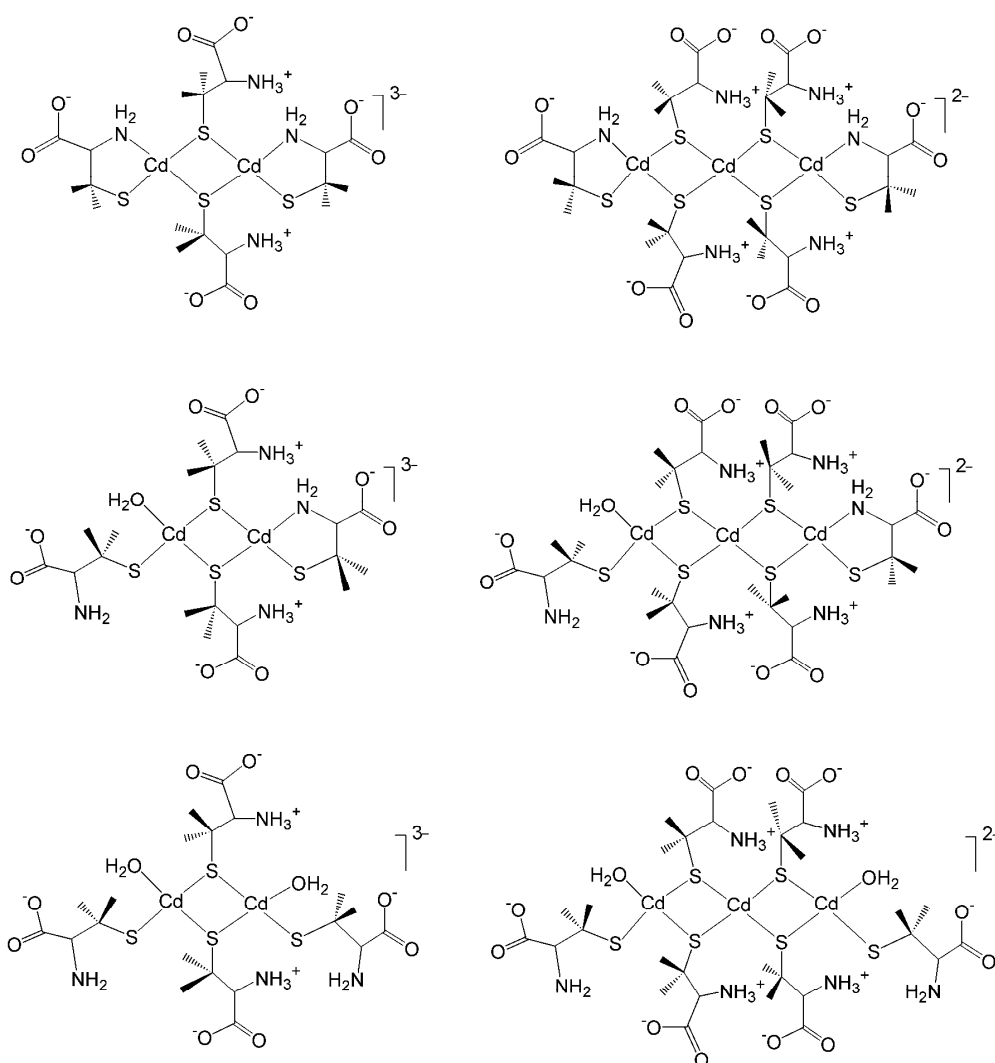

**Scheme S-2.** Possible structures for the polynuclear cadmium(II)-penicillamine complexes [Cd<sub>2</sub>(HPen)<sub>3</sub>(Pen)<sub>2</sub>]<sup>3-</sup> (*left*) and [Cd<sub>3</sub>(HPen)<sub>4</sub>(Pen)<sub>2</sub>]<sup>2-</sup> (*right*), proposed by Avdeef et al. (*Ref.* 16), to form between pH = 4 – 8 (see Figure S-2b).
